# Supplementary material for: Understanding how intrinsic micro-pores affect the dielectric properties of polymers: an approach to synthesize ultra-low dielectric polymers with bulky tetrahedral units as cores
Source: Royal Society of Chemistry journal article supplement (doi:10.1039/d0py00173b), 2020-01-01
Supplement: d0py00173b1.pdf [file d0py00173b1.pdf]

## Supporting Information

# Understanding How Intrinsic Micro-pores Affect the Dielectric Properties of Polymers: An Approach to Ultra-low Dielectric Polymers with Bulky Tetrahedral Units as Cores

Linxuan Fang,<sup>a, ‡</sup> Junfeng Zhou,<sup>a, ‡</sup> Chunqing He,<sup>b</sup> Yangqing Tao,<sup>a</sup> Caiyun Wang,<sup>a</sup>  
Menglu Dai,<sup>a</sup> Haoyang Wang,<sup>a,\*</sup> Jing Sun,<sup>a,\*</sup> and Qiang Fang<sup>a,\*</sup>

<sup>a</sup>Key Laboratory of Synthetic and Self-Assembly Chemistry for Organic Functional Molecules, Center for Excellence in Molecular Synthesis, Shanghai Institute of Organic Chemistry, University of Chinese Academy of Sciences, Chinese Academy of Sciences, 345 Lingling Road, Shanghai 200032, P. R. China.

<sup>b</sup>Key Laboratory of Nuclear Solid State Physics, Wuhan University, Wuhan, Hubei 430072, P. R. China.

### CORRESPONDING AUTHOR FOOTNOTE

Corresponding Author:

\*(H.W.) E-mail: haoyangwang@sioc.ac.cn.

\*(J.S.) E-mail: sunjing@sioc.ac.cn.

\*(Q.F.) E-mail: qiangfang@sioc.ac.cn.

**This supplemental document contains 6 figures and two equations over 6 pages.**

## **Contents:**

**Fig. S1**  $^1\text{H}$  NMR spectrum (top, 400 MHz,  $\text{CDCl}_3$ ) and  $^{13}\text{C}$  NMR spectrum (down, 100 MHz,  $\text{CDCl}_3$ ) of **4a**.

**Fig. S2**  $^1\text{H}$  NMR spectrum (top, 400 MHz,  $\text{CDCl}_3$ ) and  $^{13}\text{C}$  NMR spectrum (down, 100 MHz,  $\text{CDCl}_3$ ) of **4b**.

**Fig. S3**  $^{19}\text{F}$  NMR spectra (376 MHz,  $\text{CDCl}_3$ ) of monomers **4a** and **4b**.

**Fig. S4** TGA curves of **4a** and **4b** in  $\text{N}_2$  with a heating rate of  $10\text{ }^\circ\text{C min}^{-1}$ .

**Fig. S5** DMA curves of cured **4a** and **4b** at a heating rate of  $5\text{ }^\circ\text{C min}^{-1}$  in air.

**Fig. S6** Positron lifetime distribution spectra measured for cured **4a** and cured **4b**.

**Equation S1 and S2.**

**The route for the measurement of dielectric constant using non-contact parallel-plate capacitor method.**

**Table S1** Crystal data for compound **4b**.

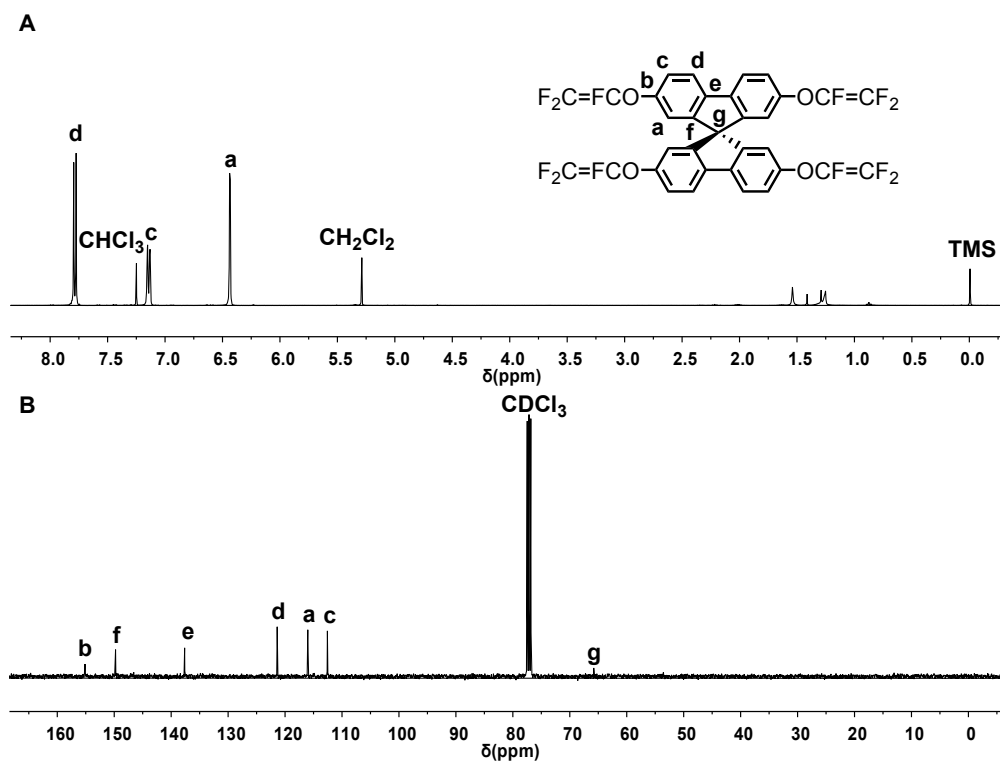

**Fig. S1**  $^1\text{H}$  NMR spectrum (up, 400 MHz,  $\text{CDCl}_3$ ) and  $^{13}\text{C}$  NMR spectrum (down, 100 MHz,  $\text{CDCl}_3$ ) of **4a**.

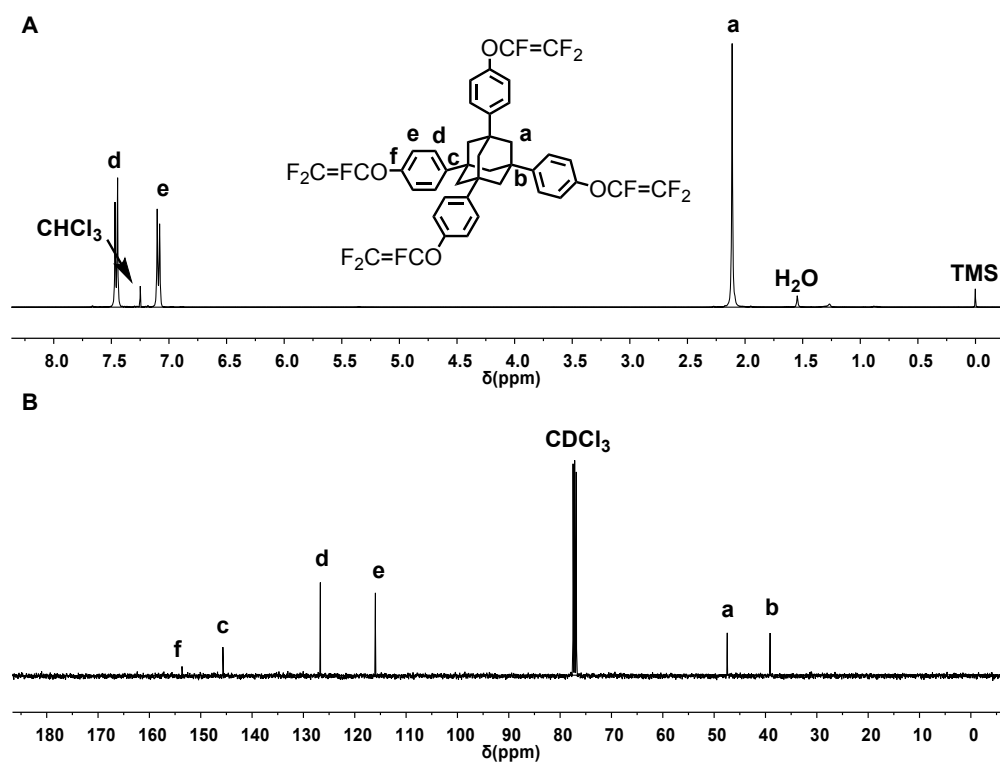

**Fig. S2**  $^1\text{H}$  NMR spectrum (up, 400 MHz,  $\text{CDCl}_3$ ) and  $^{13}\text{C}$  NMR spectrum (down, 100 MHz,  $\text{CDCl}_3$ ) of **4b**.

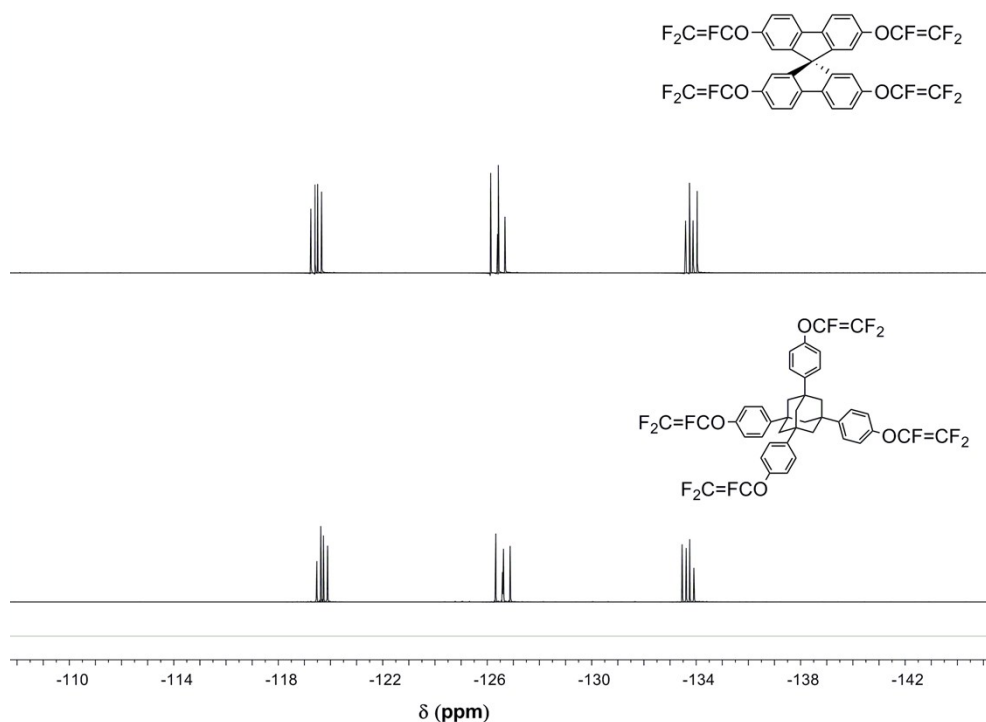

**Fig. S3**  $^{19}\text{F}$  NMR spectra (376 MHz,  $\text{CDCl}_3$ ) of monomers **4a** and **4b**.

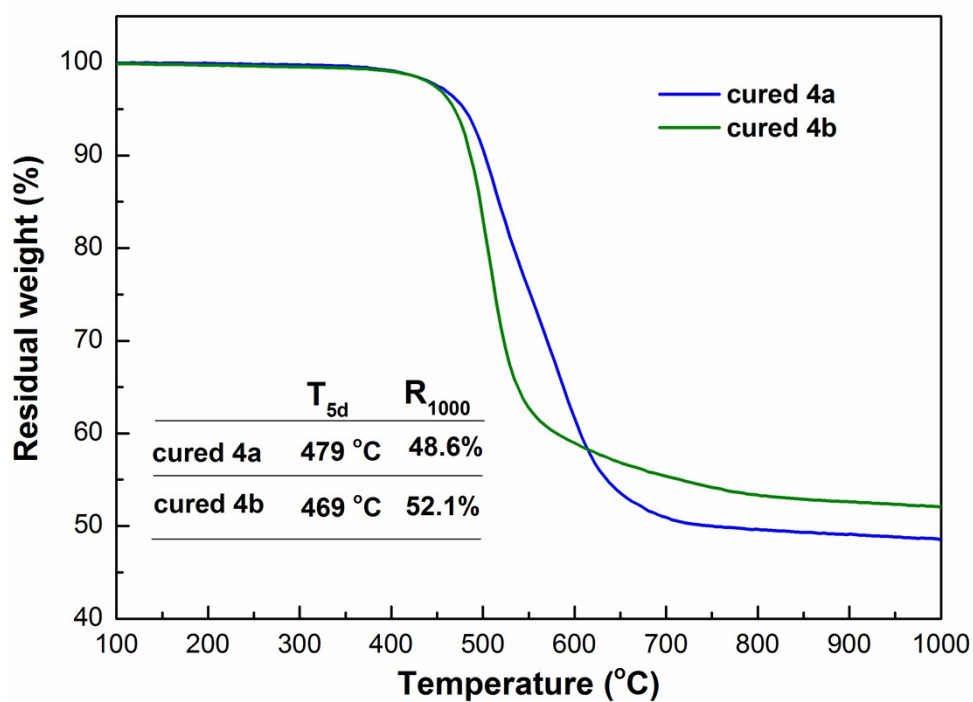

**Fig. S4** TGA curves of **4a** and **4b** in  $\text{N}_2$  with a heating rate of  $10\text{ }^\circ\text{C min}^{-1}$ .

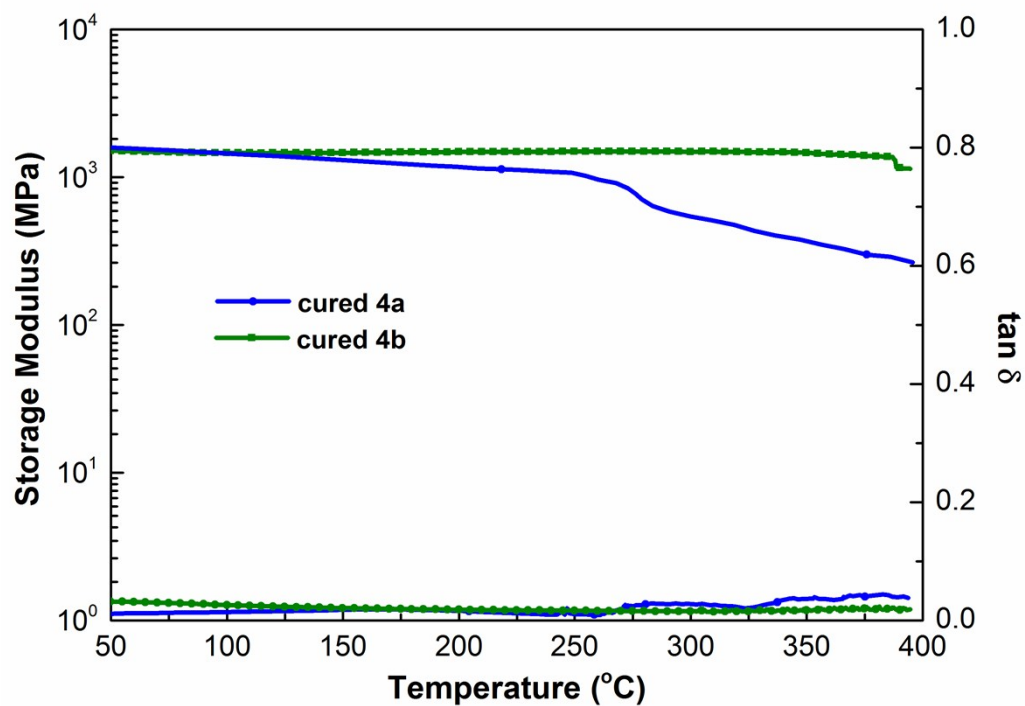

Fig. S5 DMA curves of cured **4a** and cured **4b** at a heating rate of  $5\text{ }^{\circ}\text{C min}^{-1}$  in air.

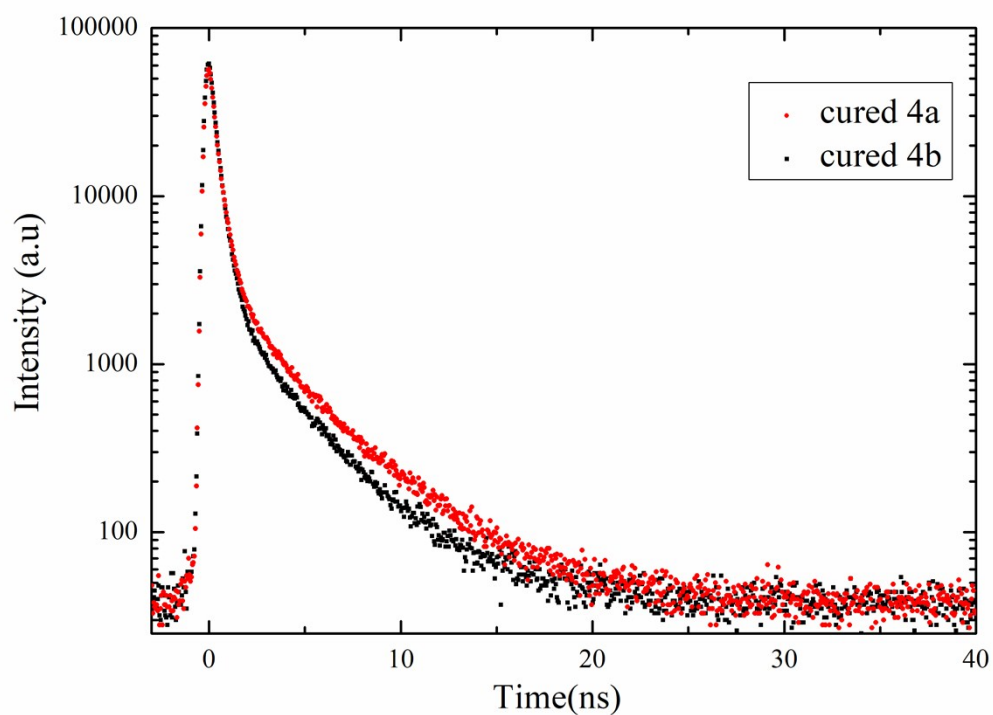

Fig. S6 Positron lifetime distribution spectra measured for cured **4a** and cured **4b**.

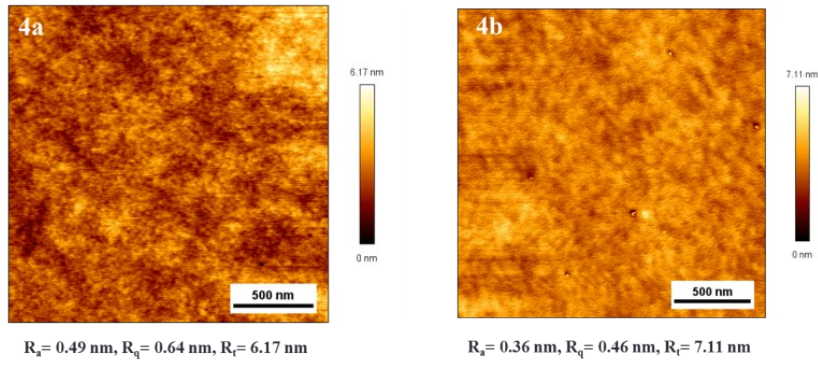

**Fig. S7** AFM images of cured **4a** and cured **4b** films on silicon wafers.

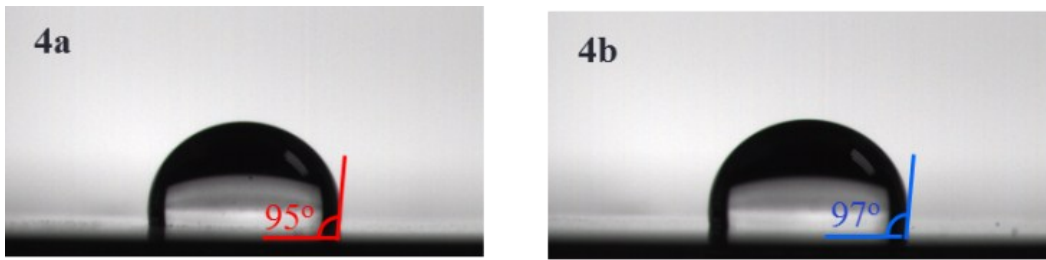

**Fig. S8** Pictures of the contact angle of water of cured **4a** and cured **4b** films on silicon wafers.

**Equation 1 and 2.**

$$\tau_3 = \frac{1}{2} \left[ 1 - \frac{r}{r + \Delta r} + \frac{1}{2\pi} \sin \left( 2\pi \frac{r}{r + \Delta r} \right) \right]^{-1} \quad (\text{Eq. S1})$$

$$f_v = CV_f I_3 \quad (\text{Eq. S2})$$

where  $\tau_3$  (ns) is the o-Ps lifetime,  $r$  (Å) represents the average radius of a free volume pores, which is assumed to be spherical, and  $\Delta r$  is the fitted empirical electron layer thickness (1.66 Å).  $f_v$  is the fraction free volume,  $V_f (= 4\pi r^3 / 3, \text{ in } \text{Å}^3)$  is the volume of free volume holes and  $C$  is empirically determined to be 0.0018 from epoxy data and the WLF (Williams-Landel-Ferry) free-volume equation.

**The route for the measurement of dielectric constant using non-contact parallel-plate capacitor method.**

**The preparation of the samples.** A cylindric test sample with average diameters of 15.0 mm was polished until the thickness of the sample was uniform before test.

**Calibration of the instrument.** Agilent 4294A Precision Impedance Analyzer equipped with the 16451B electrodes (Guarded electrode and Unguarded electrode) should be calibrated three times with a Teflon standard sample sheet until a constant value of 2.1 was achieved.

**The measurement.** A non-contact mode means that the Guard electrode does not touch the test material in the process of testing. In addition to instrument calibration, following two steps completes the testing process.

**Step 1** Place test material between the two electrodes. Then adjust the electrode spacing and make the distance between the Guard electrode and the test material is less than 10% of the thickness of test material. Get capacitance  $C_{s2}$  and dissipation  $D_2$  are obtained from Agilent 4294A.

**Step 2** Remove tested material and get capacitance  $C_{s1}$  and dissipation  $D_1$ , which is actually the capacitance and dissipation of a certain thickness of air.

$D_k$  and  $D_f$  of test material were obtained automatically by Equation S3 and Equation S4:

$$D_k = \frac{1}{1 - \left(1 - \frac{C_{s1}}{C_{s2}}\right) \times \frac{t_g}{t_a}} \quad (\text{Eq. S3})$$

$$D_f = D_2 + D_k \times (D_2 - D_1) \times \left(\frac{t_g}{t_a} - 1\right) \quad (\text{Eq. S4})$$

Where,

$C_{s1}$  Capacitance **without** test material inserted;

$D_1$  Dissipation factor **without** test material inserted;

$t_g$  Gap between Guarded electrode and Unguarded electrode;

$C_{s2}$  Capacitance **with** test material inserted;

$D_2$  Dissipation factor **with** test material inserted;

$t_a$  Average thickness of test material;

$D_k$  Dielectric constant of test material;

$D_f$  Dielectric factor of test material.

**Table S1** Crystal data for compound **4b**

Identification code

mo\_d8v18538\_0m

|                                   |                                             |          |
|-----------------------------------|---------------------------------------------|----------|
| Empirical formula                 | C42 H28 F12 O4                              |          |
| Formula weight                    | 824.64                                      |          |
| Temperature                       | 173(2) K                                    |          |
| Wavelength                        | 0.71073 Å                                   |          |
| Crystal system                    | Tetragonal                                  |          |
| Space group                       | I -4                                        |          |
| Unit cell dimensions              | a = 17.3865(8) Å                            | □ = 90°. |
|                                   | b = 17.3865(8) Å                            | □ = 90°. |
|                                   | c = 7.1447(4) Å                             | □ = 90°. |
| Volume                            | 2159.8(2) Å <sup>3</sup>                    |          |
| Z                                 | 2                                           |          |
| Density (calculated)              | 1.268 Mg/m <sup>3</sup>                     |          |
| Absorption coefficient            | 0.116 mm <sup>-1</sup>                      |          |
| F(000)                            | 840                                         |          |
| Crystal size                      | 0.180 x 0.110 x 0.070 mm <sup>3</sup>       |          |
| Theta range for data collection   | 1.656 to 24.989°.                           |          |
| Index ranges                      | -20 ≤ h ≤ 20, -18 ≤ k ≤ 20, -8 ≤ l ≤ 8      |          |
| Reflections collected             | 5508                                        |          |
| Independent reflections           | 1890 [R(int) = 0.0337]                      |          |
| Completeness to theta = 25.242°   | 96.3 %                                      |          |
| Absorption correction             | Semi-empirical from equivalents             |          |
| Max. and min. transmission        | 0.7456 and 0.6111                           |          |
| Refinement method                 | Full-matrix least-squares on F <sup>2</sup> |          |
| Data / restraints / parameters    | 1890 / 177 / 187                            |          |
| Goodness-of-fit on F <sup>2</sup> | 1.058                                       |          |
| Final R indices [I > 2σ(I)]       | R1 = 0.0670, wR2 = 0.1883                   |          |
| R indices (all data)              | R1 = 0.0744, wR2 = 0.1995                   |          |
| Absolute structure parameter      | -0.2(6)                                     |          |
| Largest diff. peak and hole       | 0.435 and -0.184 e.Å <sup>-3</sup>          |          |
